# Supplementary material
Source: MDPI journal article supplement (https://www.mdpi.com/2305-7084/7/4/73)
Supplement: s1 [file s1]

Archive with 1 entries (1 files):
- ChemEngineering-2545192-supplementary.pdf
